# Supplementary material for: Theoretical predictions of structures in dispersions containing charged colloidal particles and non-adsorbing polymers
Source: Royal Society of Chemistry journal article supplement (doi:10.1039/c5cp07814h), 2016-01-01
Supplement: c5cp07814h1.pdf [file c5cp07814h1.pdf]

# Theoretical predictions of structures in dispersions containing charged colloidal particles and non-adsorbing polymers

Fei Xie\*, Martin Turesson\*, Clifford E. Woodward\*\*, Kitty van Gruijthuijsen\*\*\*,  
Anna Stradner\*\*\*\*, and Jan Forsman\*\*

*\*Theoretical Chemistry, Lund University, P.O.Box 124, S-221 00 Lund, Sweden \*\* PEMS, ADFA,  
UNSW, Canberra ACT 2600, Australia \*\*\* Adolphe Merkle Institute, University of Fribourg, Rte  
de l'ancienne Papeterie 1, CH-1723 Marly, Switzerland. \*\*\*\* Physical Chemistry, Lund  
University, P.O.Box 124, S-221 00 Lund, Sweden*

E-mail: fei.xie@teokem.lu.se

## The resolution function

Here we list some experimental data that are required to establish the resolution function,  $R(q, Q)$ .

Relevant input data are listed below:

- collimation distance:  $L_4 = 1800$  cm
- detector distance:  $L_5 = 2000$  cm
- detector cell size:  $d_{det} = 0.75$  cm
- neutron wavelength:  $\lambda = 1.2$  nm

---

\*To whom correspondence should be addressed

- wavelength spread:  $\delta_\lambda = 0.1$
- source aperture diameter:  $s_1 = 3.39$  cm
- source aperture diameter:  $s_2 = 0.01$  cm

Defining:

$$l_p \equiv \frac{L_4 L_5}{L_4 + L_5} \quad (1)$$

and

$$\sigma_q(q) \equiv \frac{q^2 \delta_\lambda^2}{6} + \left(\frac{2\pi}{\lambda}\right)^2 \left[ \frac{1}{16} \left(\frac{s_1}{L_4}\right)^2 + \left(\frac{s_2}{l_p}\right)^2 + \left(\frac{d_{det}}{2.355L_5}\right)^2 \right] \quad (2)$$

the resolution function is obtained as:

$$R(q, Q) = \frac{1}{\sqrt{2\pi\sigma_q(q)}} e^{\left(-\frac{1}{2} \frac{(Q-q)^2}{\sigma_q(q)}\right)} \quad (3)$$

The smeared structure factors can be seen in Figure 1.

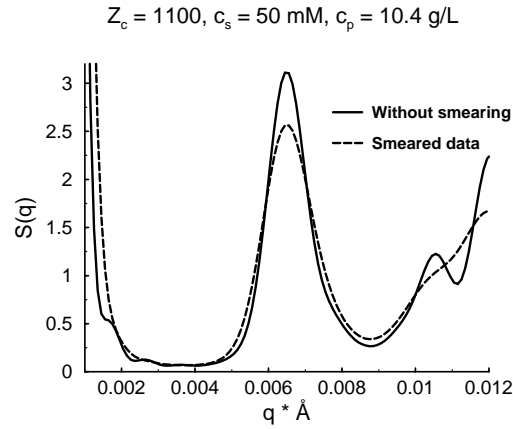

Figure 1: Comparing theoretical predicted smeared data for the structure factor, with  $c_s = 50$  mM, and  $c_p = 10.4$  g/L, for particle charge,  $Z_c = 1100$ .

## Electrostatic interaction free energies between planar surfaces

For completeness, we here present the electrostatic free energies ( $g_s$ ) that were used to produce the electrostatic particle-particle potential of mean forces utilized in the main paper.

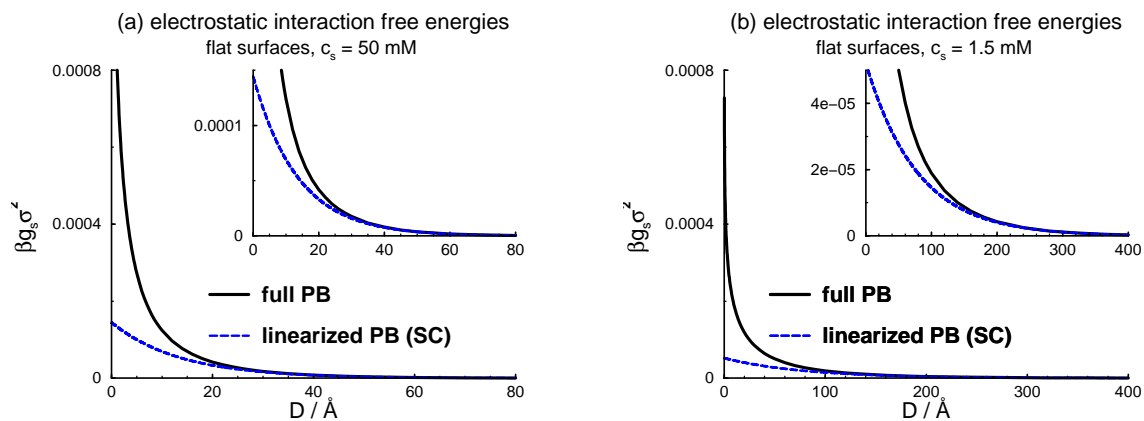

Figure 2: Comparing theoretical predictions of interaction free energies (per unit area) between flat charged surfaces. (a)  $c_s = 50$  mM. Surface charge density:  $\sigma_s = 1100e/(4\pi R_c^2)$ , where  $e$  is the elementary charge. (b)  $c_s = 1.5$  mM. Surface charge density:  $\sigma_s = 275e/(4\pi R_c^2)$ .
